# Supplementary material for: Exploring Doctors’ Emerging Commitment to Rural and General Practice Roles over Their Early Career
Source: MDPI journal article supplement (doi:10.3390/ijerph182211835), 2021-11-11
Supplement: s1 [file s1]

# Supplementary Materials

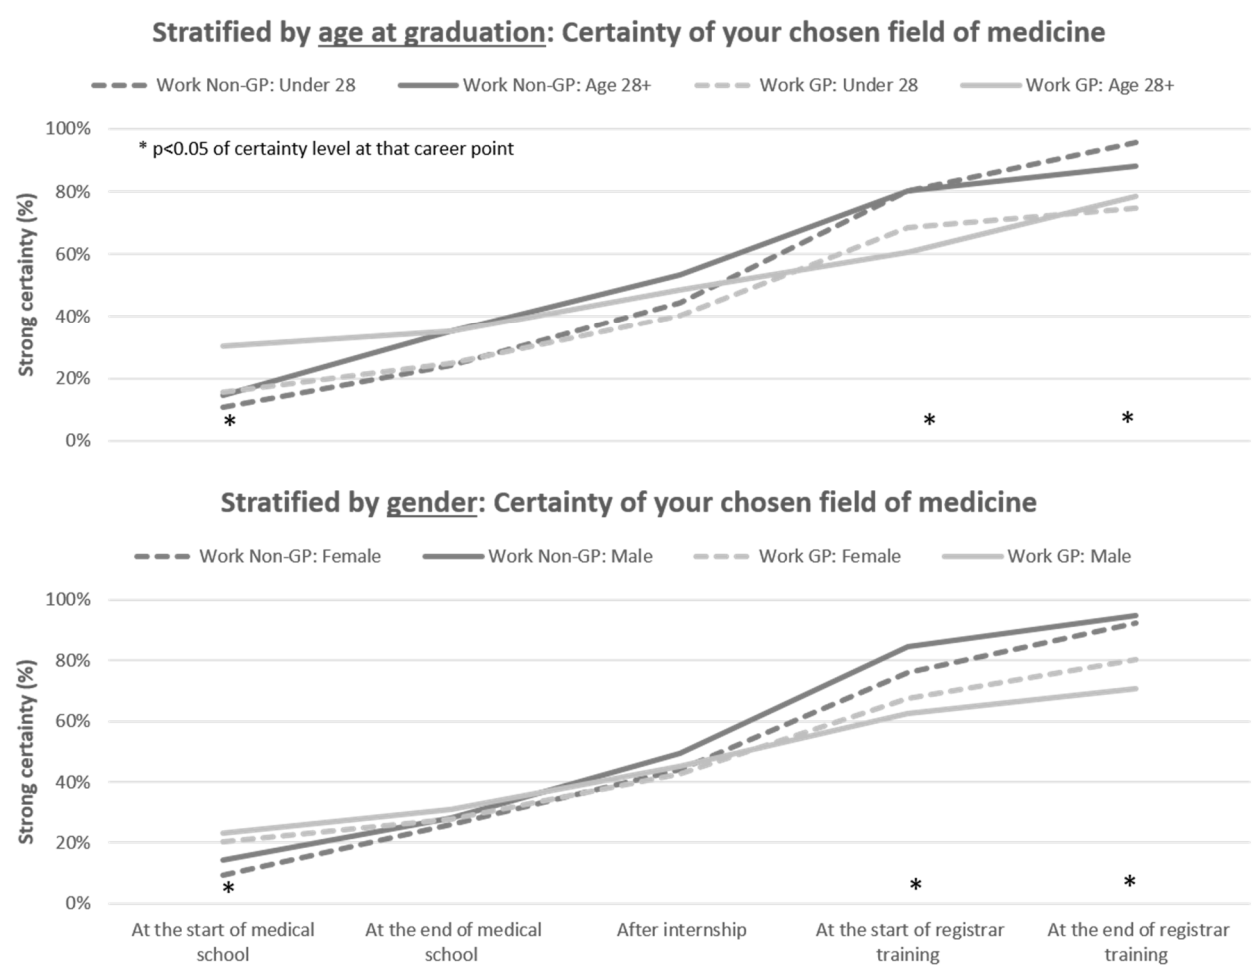

**Figure S1.** Level of certainty of their specialty decision amongst junior doctors, by other key strata (age at graduation, gender).

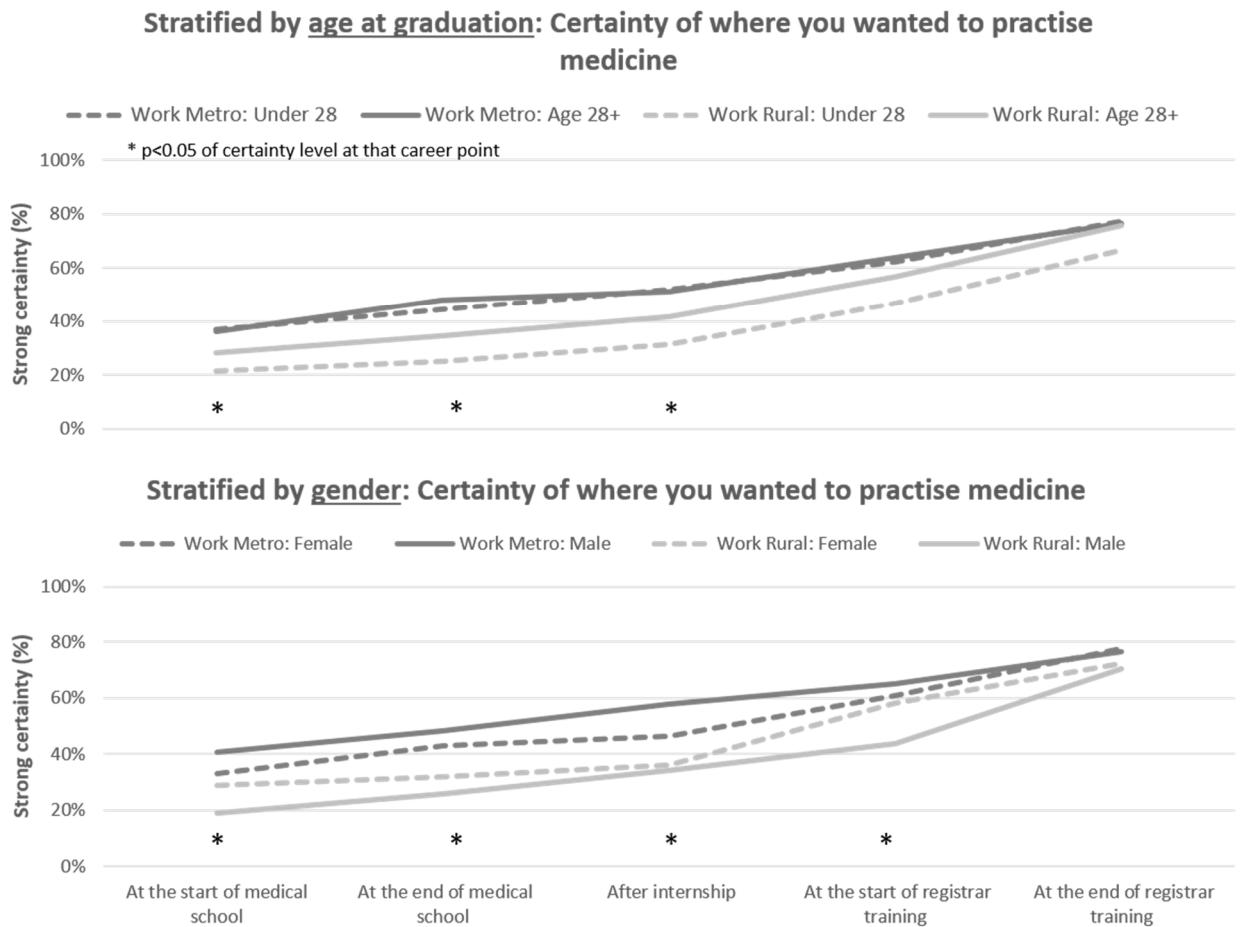

**Figure S2.** Level of certainty of their practice location decision amongst junior doctors, by other key strata (age at graduation, gender).
